# Supplementary material for: Effects of Ephedrine-Containing Products on Weight Loss and Lipid Profiles: A Systematic Review and Meta-Analysis of Randomized Controlled Trials
Source: MDPI journal article supplement (doi:10.3390/ph14111198), 2021-11-22
Supplement: s1 [file s1]

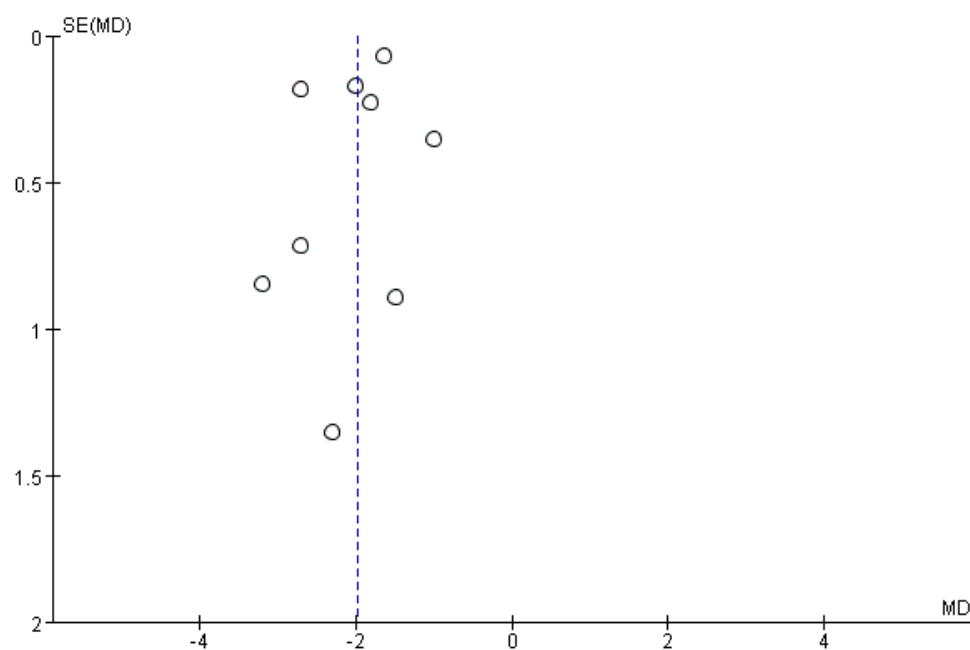

Figure S1. Funnel plot demonstrating the association between ephedrine-containing product and weight loss (kg).

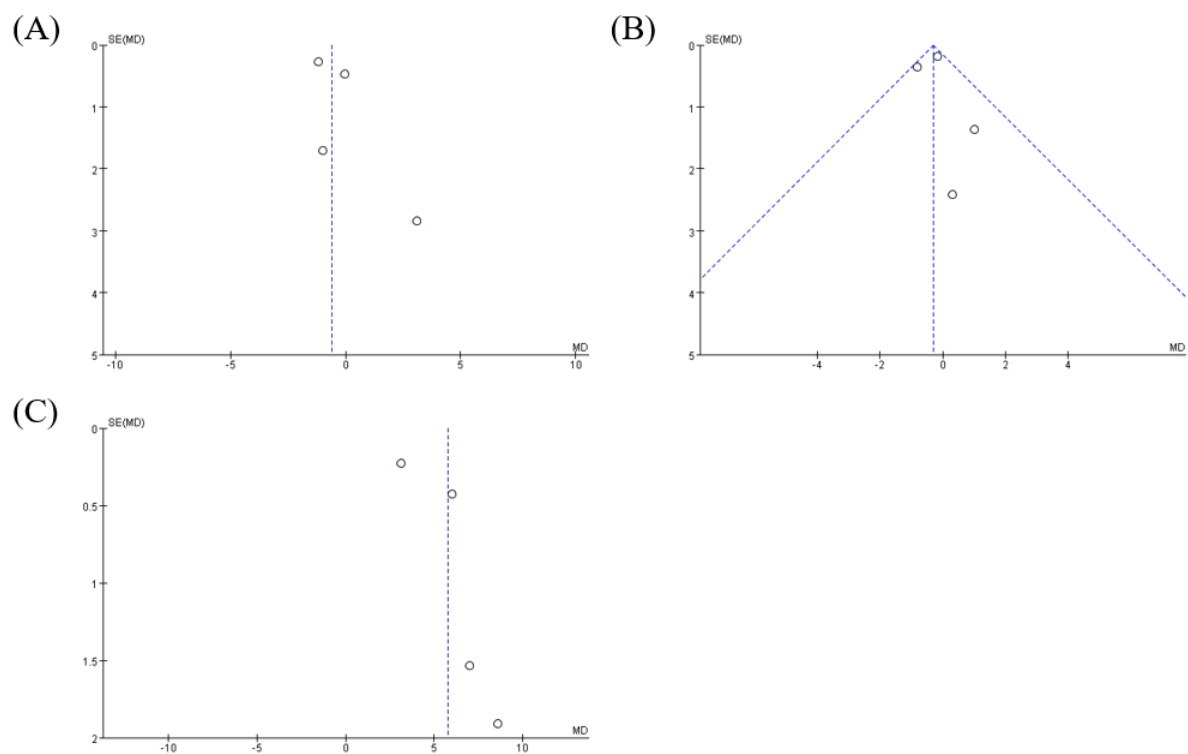

Figure S2. Funnel plots demonstrating the association between ephedrine-containing product and vital sign change. (A) Systolic blood pressure (mmHg). (B) Diastolic blood pressure (mmHg). (C) Heart rate (beats/min).

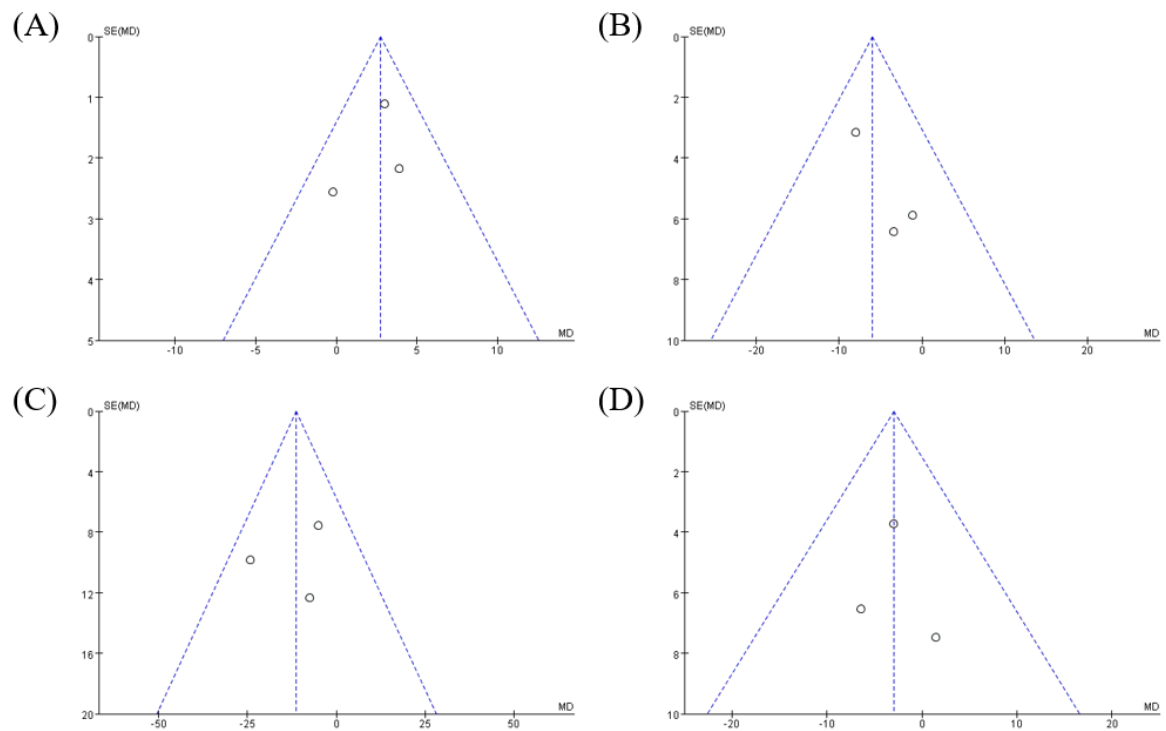

Figure S3. Funnel plots demonstrating the association between ephedrine-containing product and lipid level change. (A) High-density lipoprotein cholesterol (mg/dL). (B) Low-density lipoprotein cholesterol (mg/dL). (C) Triglycerides (mg/dL). (D) Total cholesterol (mg/dL).

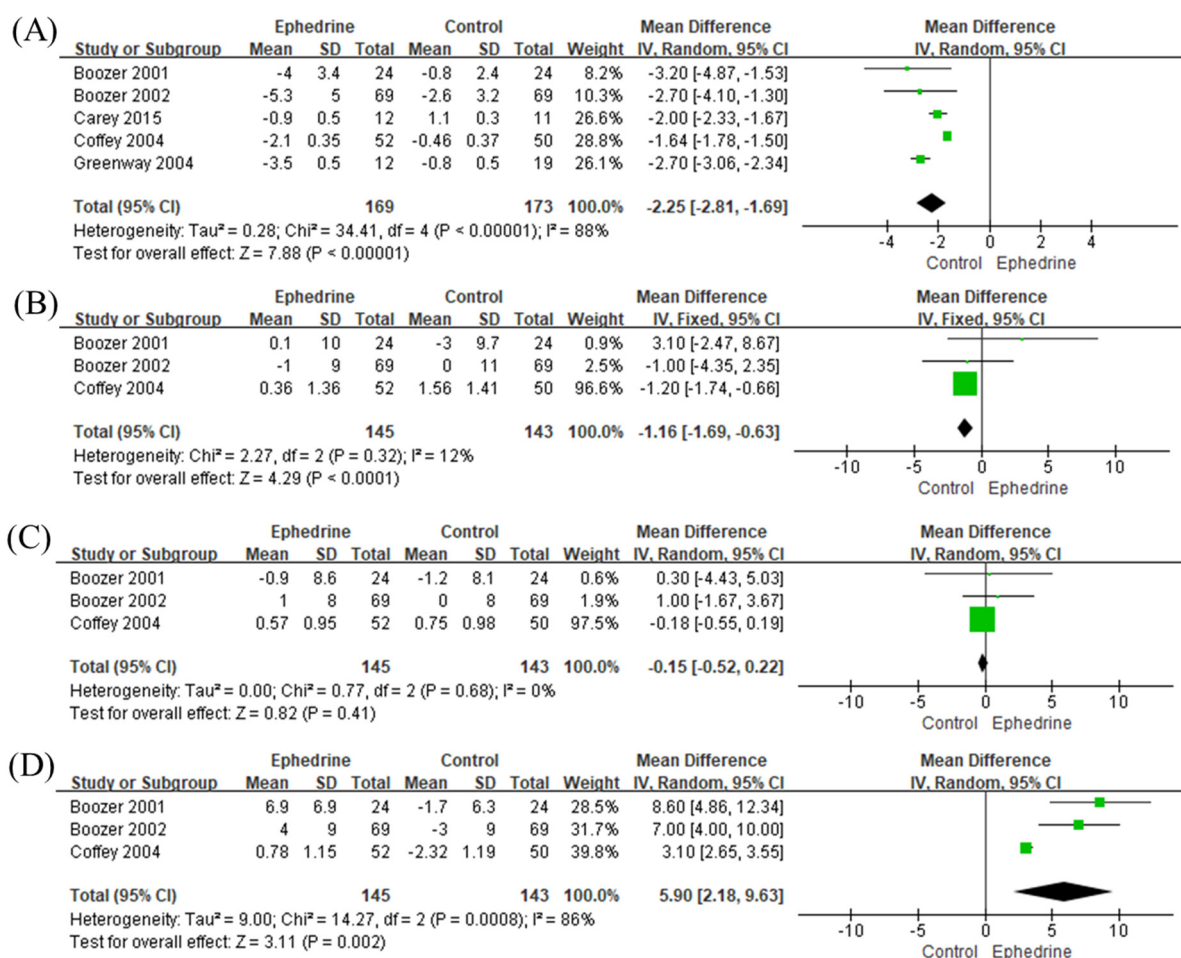

Figure S4. Forest plots of subgroup analysis with studies published after 2000s. (A) weight loss (kg); (B) systolic blood pressure (mmHg); (C) diastolic blood pressure (mmHg); (D) heart rate (beats/min).
